# Supplementary material
Source: HighWire-hosted journal article supplement (https://fg.bmj.com/highwire/filestream/144065/field_highwire_adjunct_files/0/flgastro-2022-102129supp001_data_supplement.pdf)
Supplement: flgastro-2022-102129supp001_data_supplement.pdf [file flgastro-2022-102129supp001_data_supplement.pdf]

| <b>Demographic</b>                         | <b>Number of cases (%)</b>                |
|--------------------------------------------|-------------------------------------------|
| Age (years)                                | 44.74 +/- 14.95 (range 19.6 - 97.9 years) |
| Gender M/F                                 | 108/117 (48%/52%)                         |
| <b>Indication (new)</b>                    |                                           |
| Reflux/atypical chest pain                 | 80/225 (35.6%)                            |
| Dyspepsia/epigastric pain                  | 35/225 (15.6%)                            |
| Dysphagia                                  | 28/225 (12.4%)                            |
| Globus/oropharyngeal symptoms              | 18/225 (8%)                               |
| Nausea/vomiting                            | 10/225 (4.4%)                             |
| Anaemia assessment                         | 7/225 (3.1%)                              |
| Weight loss                                | 2/225 (0.9%)                              |
| Other                                      | 16/225 (7.1%)                             |
| <b>Indication (follow-up/surveillance)</b> |                                           |
| Barrett's oesophagus                       | 11/225 (4.9%)                             |
| Eosinophilic oesophagitis                  | 18/225 (8%)                               |

**Appendix 1. Demographics and indications for transnasal endoscopy from our training experience**
